# Supplementary material
Source: PubMed Central journal article supplement (PMC5927820)
Supplement: NIHMS954773-supplement-SupplFigs.pdf [file NIHMS954773-supplement-SupplFigs.pdf]

## **SUPPLEMENTAL INFORMATION**

### **Erastin-like Anti-Warburg Agents Prevent Mitochondrial Depolarization Induced by Free Tubulin and Decrease Lactate Formation in Cancer Cells**

David N. DeHart, John J. Lemasters and Eduardo N. Maldonado

Address correspondence to: John J. Lemasters, M.D., Ph.D.  
Eduardo N. Maldonado, D.V.M., Ph.D.  
Center for Cell Death, Injury & Regeneration  
Department of Drug Discovery & Biomedical Sciences  
Medical University of South Carolina  
70 President Street, MSC 139  
Charleston, SC 29425  
Phone: (843)-876-2362  
Email: JJLemasters@musc.edu  
maldona@musc.edu

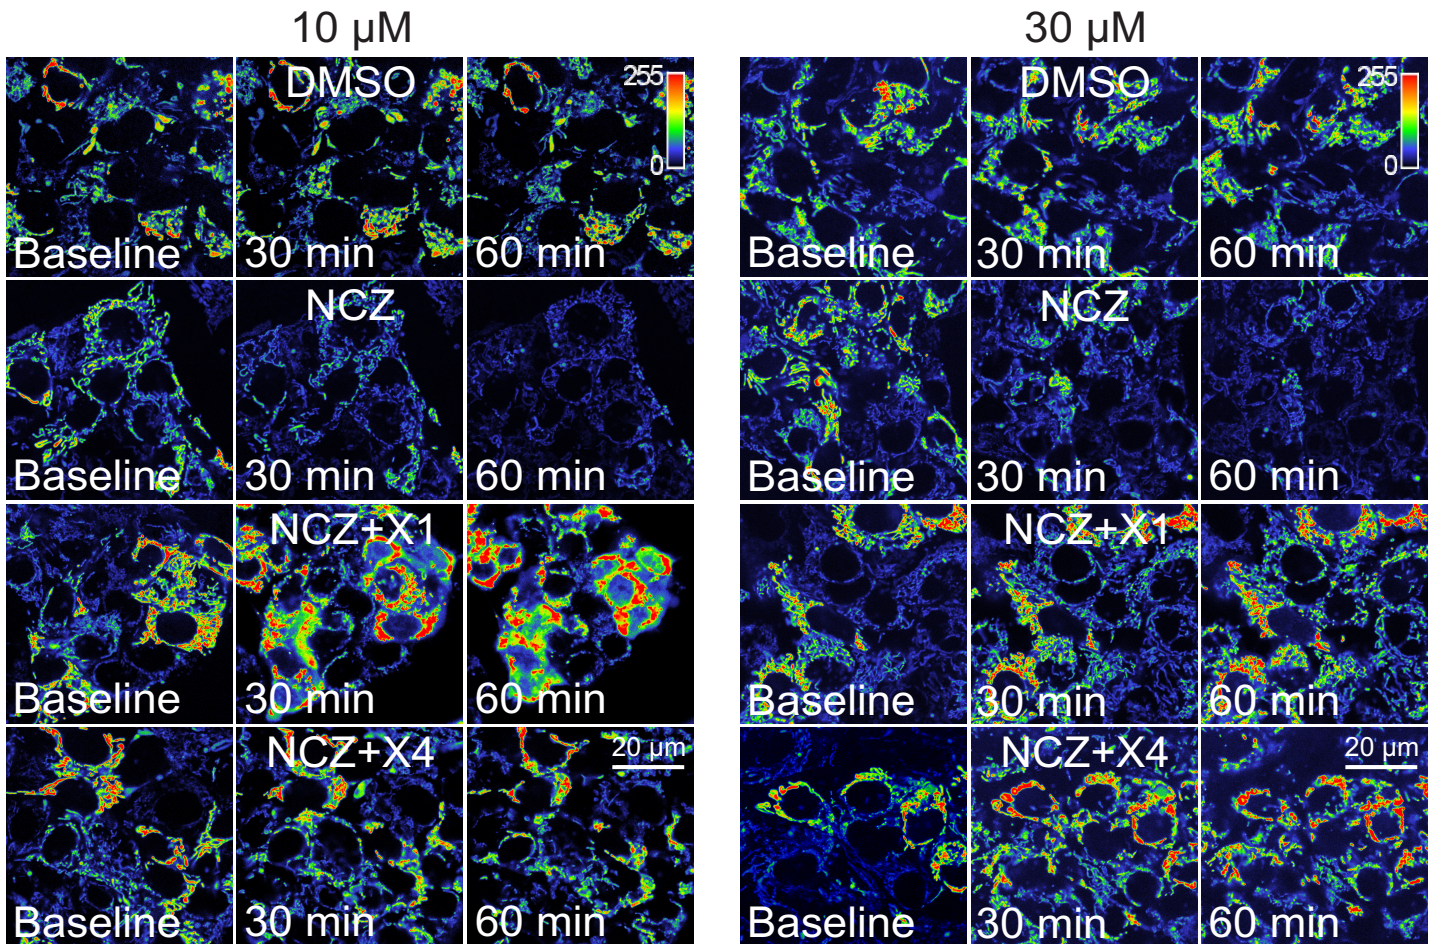

**Suppl. Fig. 1. Lead validation by confocal microscopy in HeG2 hepatoma cells.** HepG2 cells were untreated (DMSO) or treated with NCZ (10 μM) or NCZ (10 μM) plus X1 or X4 (10-30 μM), and TMRM fluorescence was imaged at 0, 30 and 60 min. This figure extends Fig. 5 by showing baseline and intermediate imaging time points for each treatment. Note that TMRM fluorescence was stable in untreated cells and that NCZ decreased TMRM intensity relative to baseline with the greatest decrease after 60 min. At 10 and 30 μM, X1 and X4 both blocked NCZ induced mitochondrial depolarization and actually increased TMRM intensity relative to baseline.

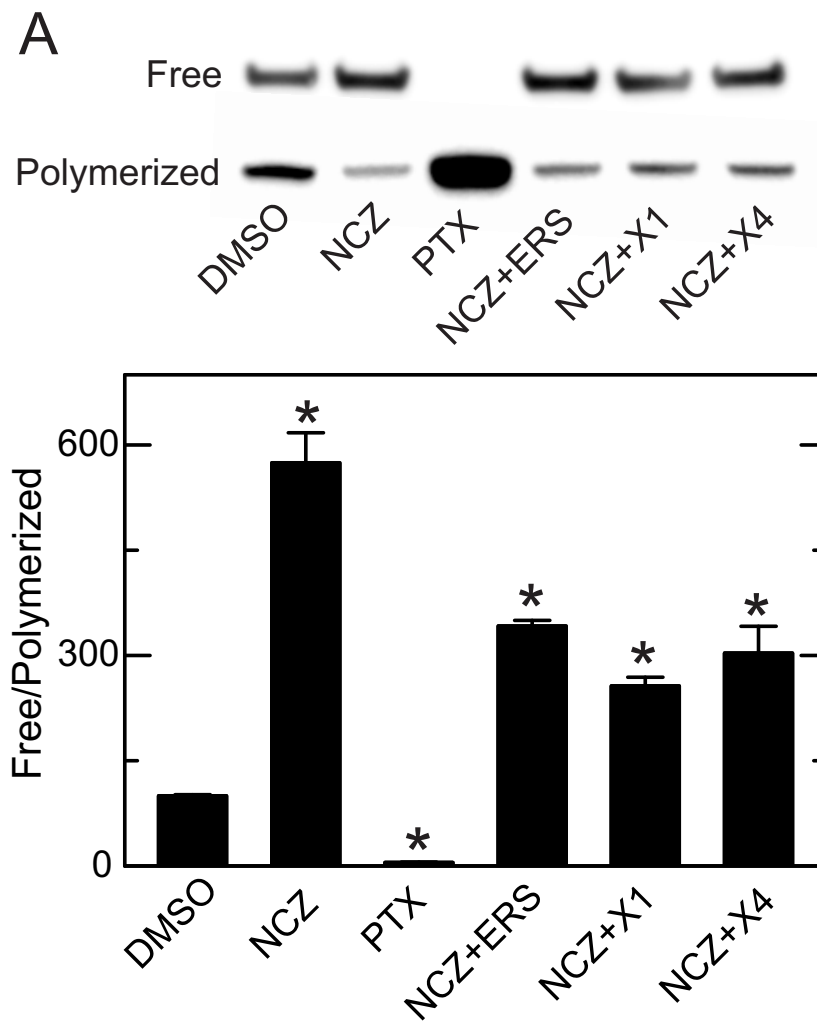

**Suppl. Fig. 2 Free to polymerized tubulin ratios after treatment with erastin and lead compounds in the presence of NCZ.** In **A**, Western blotting of tubulin was performed after separating free and polymerized tubulin, as described in **Materials and Methods**. HepG2 cells were treated with vehicle (DMSO), NCZ or 10  $\mu$ M X1 or X4 in the presence of NCZ. Representative blots are shown from 3 independent experiments. In **B**, free/polymerized tubulin ratios were calculated using relative band densities. \* $p < 0.05$  compare to DMSO (n=3).
